# Supplementary material for: Identification of Late Embryogenesis Abundant (LEA) Protein Putative Interactors Using Phage Display
Source: PubMed Central journal article supplement (PMC3397483; doi:10.3390/ijms13066582), 2012-05-29

# Identification of Late Embryogenesis Abundant (LEA) Protein Putative Interactors Using Phage Display

## Supplemental Information

**Figure S.1.** The percentage (%) of randomly chosen plaque that contained insert greater than 300 bp from seed library 1 (SL1) for SMP1- (**a** and **d**), *GmPM28*- (**b** and **e**), and BSA-biopans (**c** and **f**) for each round of biopanning at either 25 or 41 °C.

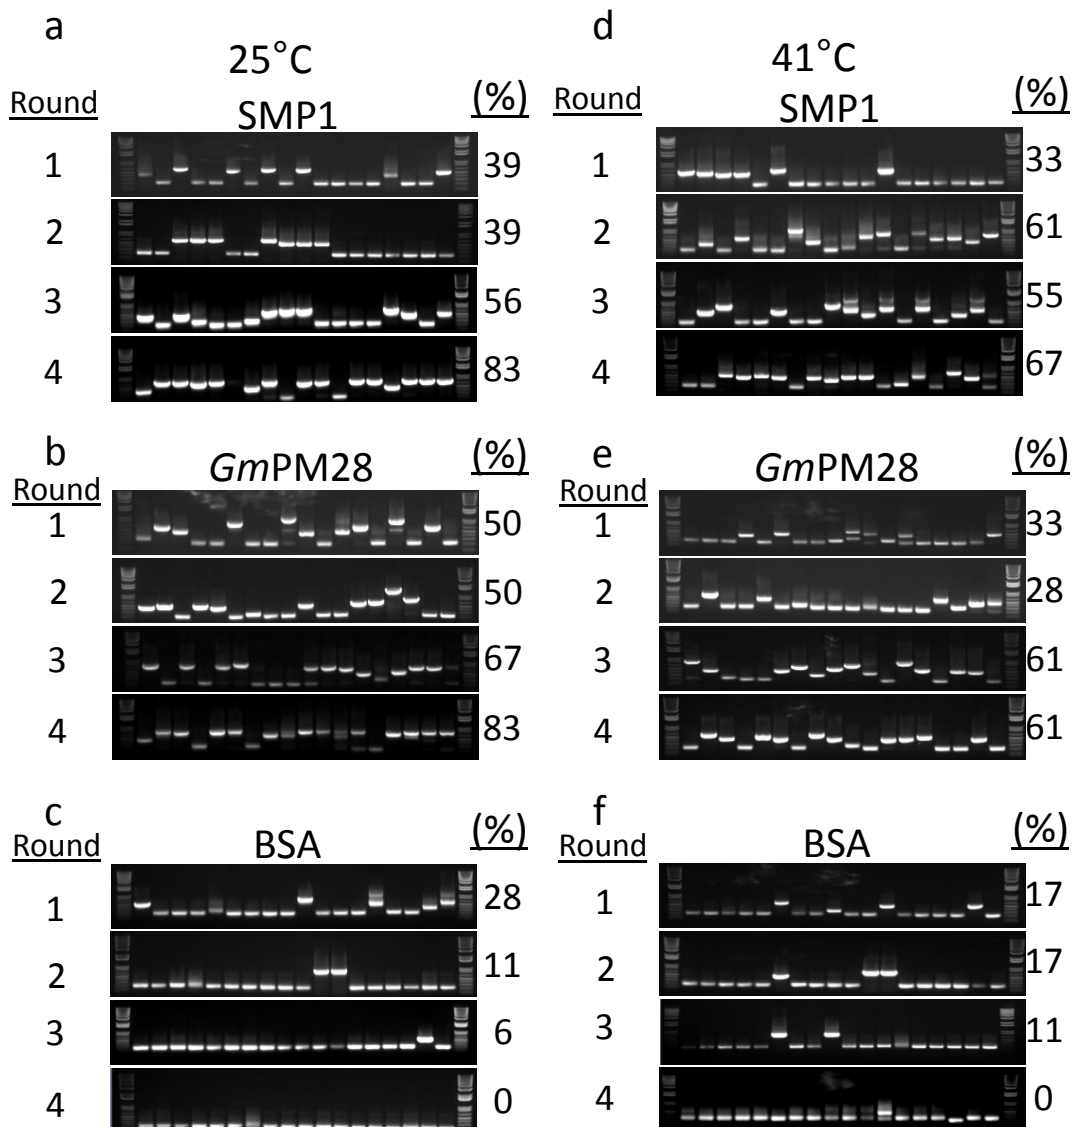

**Figure S.2.** The percentage (%) of randomly chosen plaque that contained insert greater than 300 bp from seed library 2 (SL2) for SMP1- (a and d), *GmPM28*- (b and e), and BSA-biopans (c and f) for each round of biopanning at either 25 or 41 °C.

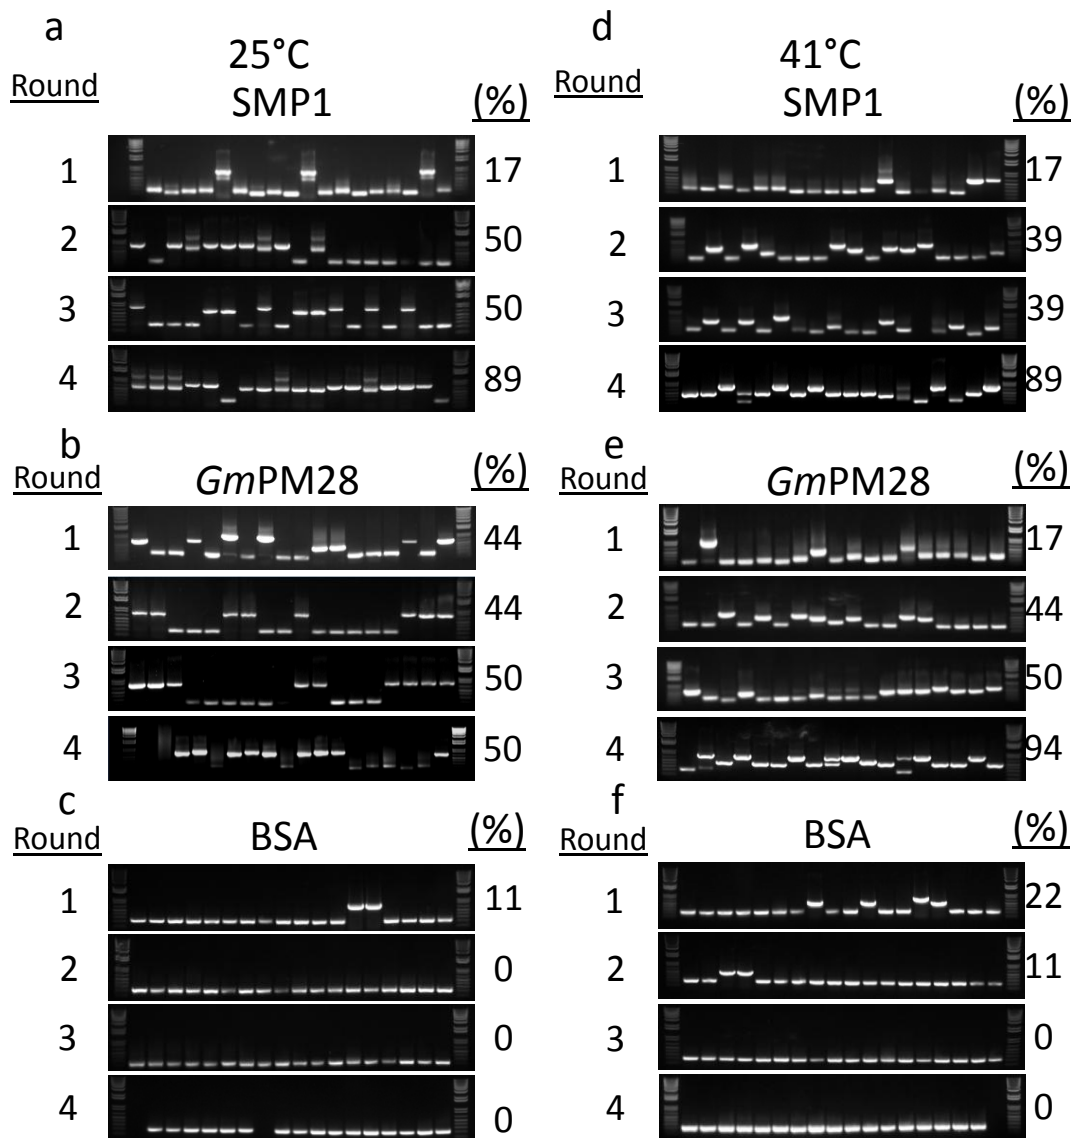

Supplement: ijms-13-06582-s001.pdf [file ijms-13-06582-s001.pdf]
